# Supplementary material for: Heterostructured Li3VO4–Ga2O3-embedded porous carbon nanofibers as advanced anode materials for lithium-ion batteries
Source: Royal Society of Chemistry journal article supplement (doi:10.1039/d3cp03370h), 2023-01-01
Supplement: d3cp03370h1.pdf [file d3cp03370h1.pdf]

## Electronic Supplementary Information

### Heterostructured Ga<sub>2</sub>O<sub>3</sub>-Li<sub>3</sub>VO<sub>4</sub>-Embedded Porous Carbon Nanofibers as Advanced Anode Materials for Lithium-ion Batteries

*Canyang Chen<sup>a</sup>, Cunyuan Pei<sup>a\*</sup>, Song Yang<sup>a</sup>, Huijuan Ma<sup>b</sup>, Dongmei Zhang<sup>a</sup>, Bing Sun<sup>a</sup>, Shibing Ni<sup>a\*</sup>*

*<sup>a</sup> College of Materials and Chemical Engineering, Key Laboratory of Inorganic Nonmetallic Crystalline and Energy Conversion Materials, China Three Gorges University, Yichang, 443002, China*

*<sup>b</sup> Hubei Three Gorges Laboratory, Yichang, 443007, China.*

*\* E-mail: peicunyan@ctgu.edu.cn; shibingni07@126.com*

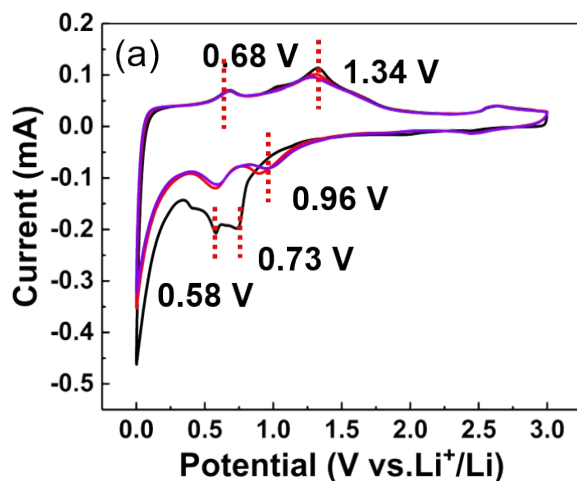

Figure S1 (a) CV curves of  $\text{Li}_3\text{VO}_4\text{-Ga}_2\text{O}_3$ .

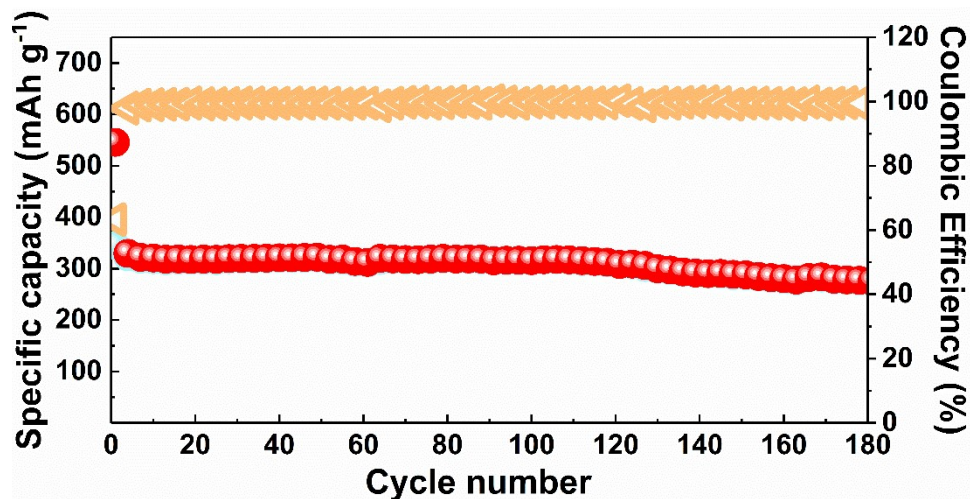

Figure S2 (a) Cycle performance and coulombic efficiency of  $\text{Li}_3\text{VO}_4\text{-Ga}_2\text{O}_3$  at a specific current of  $0.2 \text{ A g}^{-1}$ .

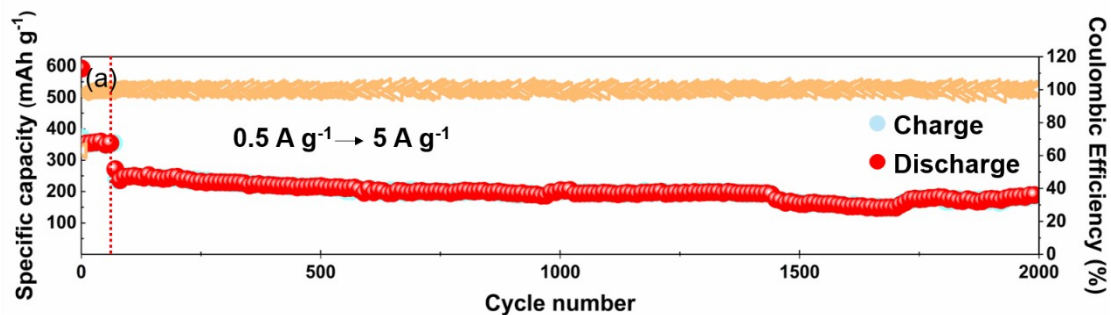

Figure S3 (a) Long cycle performance of  $\text{Li}_3\text{VO}_4\text{-Ga}_2\text{O}_3$  at charge/discharge current densities of  $5.0 \text{ A g}^{-1}$ .

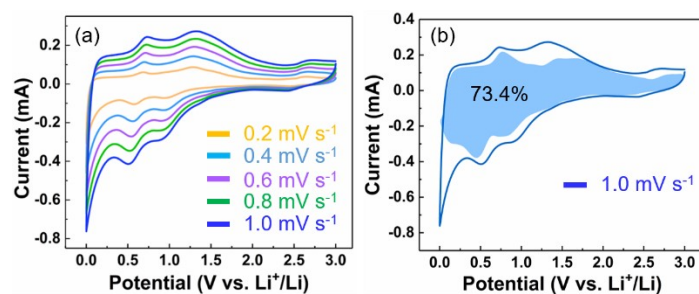

**Figure S4** (a) CV curves at different scan rates and (b) pseudocapacitive charge storage at  $1.0 \text{ mV s}^{-1}$  for pristine  $\text{Li}_3\text{VO}_4\text{-Ga}_2\text{O}_3$

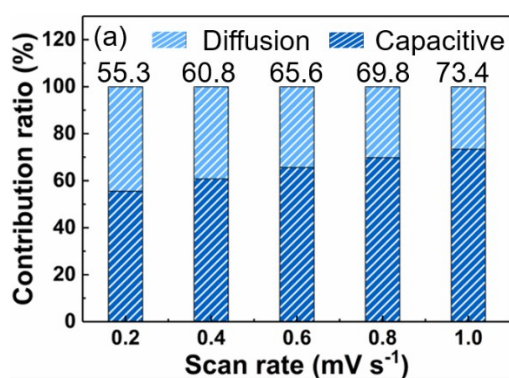

**Figure S5** (a) Capacitive contribution variation along with different scan rates for pristine  $\text{Li}_3\text{VO}_4\text{-Ga}_2\text{O}_3$ .

**Table S1** The rate performance comparison between our work and previous reported  $\text{Li}_3\text{VO}_4$  based batteries.

| Electrode  | Rate number | Capacity/current                       | Ref. |
|------------|-------------|----------------------------------------|------|
|            |             | ( $\text{mA g}^{-1}/\text{A g}^{-1}$ ) |      |
| Ni-LVO     | 800         | 370/1.0                                | 1    |
| LVO/C-Ni   | 2000        | 325/10C                                | 2    |
| LVO/C/rGo  | 5000        | 325/4.0                                | 3    |
| LVO/rGO-HS | 1500        | 258.0/4.0                              | 4    |
| LVO/CNT    | 2000        | 250/2.0                                | 5    |
| LVO        | 500         | 280.9/2.0                              | 6    |

|                                                                       |      |          |           |
|-----------------------------------------------------------------------|------|----------|-----------|
| Ag@Li <sub>3</sub> VO <sub>4</sub>                                    | 150  | 498/0.15 | 7         |
| Li <sub>3</sub> VO <sub>4</sub> /MXene                                | 1000 | 146/2.0  | 8         |
| Li <sub>3</sub> VO <sub>4</sub> /NiO/Ni                               | 100  | 612/0.07 | 9         |
| Li <sub>3</sub> VO <sub>4</sub> -Ga <sub>2</sub> O <sub>3</sub> /NC   | 400  | 652/0.1  | 10        |
| Li <sub>3</sub> VO <sub>4</sub> -Ga <sub>2</sub> O <sub>3</sub> @PCNF | 2000 | 320/4.0  | this work |

Notes and references:

- 1 Zhang C, Wang K, Liu C, et al. *NPG Asia Mater.*, 2016, **8**, e287-e287.
- 2 Zhang J, Ni S, Kang T, et al. *J. Mater. Chem. A*, 2016, **4**, 14101-14105.
- 3 Li Q, Wei Q, Sheng J, et al. *Adv. Sci.*, 2015, **2**, 1500284.
- 4 Li Q, Wei Q, Wang Q, et al. *J. Mater. Chem. A*, 2015, **3**, 18839-18842.
- 5 Li Q, Sheng J, Wei Q, et al. *Nanoscale*, 2014, **6**, 11072-11077.
- 6 Li Q, Wei Q, Wang Q, et al. *J. Mater. Chem. A*, 2015, **3**, 18839-18842.
- 7 Kang T, Ni S, Chen Q, et al. *J. Electrochem. Soc.*, 2019, **166**, A5295.
- 8 Huang Y, Yang H, Zhang Y, et al. *J. Mater. Chem. A*, 2019, **7**, 11250-11256.
- 9 Ni S, Zhang J, Lv X, et al. *J. Power Sources*, 2015, **291**, 95-101.
- 10 Yang S, Xu Z, Xu J, et al. *J. Alloys Compd.*, 2021, **868**, 159115.
